# Supplementary material for: Changes in ischaemic ECG abnormalities and subsequent risk of cardiovascular disease
Source: PubMed Central journal article supplement — Heart Asia. 2017 Jan 23;9(1):36–43. doi: 10.1136/heartasia-2016-010846 (PMC5278342; doi:10.1136/heartasia-2016-010846), 2017-01-23
Supplement: heartasia-2016-010846supp_tables.pdf [file heartasia-2016-010846supp_tables.pdf]

**Table S1** Gender-specific hazard ratios and 95% confidence intervals of cardiovascular disease for ECG abnormalities in Code4 and 5 at study entry

| MC           | At entry                               | No. at risk                            |                                        | Stroke                             | Coronary heart disease | Total CVD         |                   |                 |
|--------------|----------------------------------------|----------------------------------------|----------------------------------------|------------------------------------|------------------------|-------------------|-------------------|-----------------|
| <b>Men</b>   |                                        |                                        |                                        |                                    |                        |                   |                   |                 |
| Code4        | No                                     | 4033                                   | cases                                  | 435 (Reference)                    | 177 (Reference)        | 595 (Reference)   |                   |                 |
|              |                                        |                                        | Minor                                  | 263                                | cases                  | 63                | 17                | 78              |
|              |                                        |                                        | Age- and gender- adjusted HR (Model 1) | 2.45 (1.88-3.20)‡                  | 1.56 (0.95-2.58)       | 2.24 (1.76-2.84)‡ |                   |                 |
|              |                                        |                                        |                                        | Multivariate-adjusted HR (Model 2) | 1.94 (1.48-2.55)‡      | 1.31 (0.78-2.18)  | 1.80 (1.42-2.30)‡ |                 |
|              |                                        |                                        |                                        | Multivariate-adjusted HR (Model 3) | 1.86 (1.42-2.45)‡      | 1.22 (0.72-2.05)  | 1.73 (1.36-2.22)‡ |                 |
|              | Major                                  | 121                                    | cases                                  | 31                                 | 17                     | 45                |                   |                 |
|              |                                        |                                        | Age- and gender- adjusted HR (Model 1) | 2.86 (1.98-4.13)‡                  | 4.07 (2.46-6.75)‡      | 3.24 (2.38-4.40)‡ |                   |                 |
|              |                                        |                                        | Multivariate-adjusted HR (Model 2)     | 1.85 (1.26-2.72)†                  | 2.99 (1.75-5.11)‡      | 2.25 (1.64-3.08)‡ |                   |                 |
|              |                                        |                                        | Multivariate-adjusted HR (Model 3)     | 1.82 (1.23-2.68)†                  | 2.68 (1.56-4.61)‡      | 2.18 (1.58-3.00)‡ |                   |                 |
|              |                                        |                                        | Code5                                  | 4028                               | cases                  | 448 (Reference)   | 174 (Reference)   | 603 (Reference) |
|              |                                        |                                        |                                        |                                    | Minor                  | 311               | cases             | 61              |
|              | Age- and gender- adjusted HR (Model 1) | 2.02 (1.54-2.64)‡                      |                                        |                                    | 1.73 (1.10-2.72)*      | 2.04 (1.62-2.58)‡ |                   |                 |
|              |                                        |                                        | Multivariate-adjusted HR (Model 2)     | 1.45 (1.09-1.91)†                  | 1.36 (0.85-2.18)       | 1.51 (1.18-1.91)‡ |                   |                 |
|              |                                        |                                        | Multivariate-adjusted HR (Model 3)     | 1.39 (1.05-1.84)*                  | 1.33 (0.83-2.14)       | 1.46 (1.15-1.86)† |                   |                 |
| Major        | 78                                     | cases                                  | 20                                     | 16                                 | 33                     |                   |                   |                 |
|              |                                        | Age- and gender- adjusted HR (Model 1) | 2.97 (1.90-4.66)‡                      | 6.49 (3.87-10.87)‡                 | 3.93 (2.76-5.59)‡      |                   |                   |                 |
|              |                                        | Multivariate-adjusted HR (Model 2)     | 1.93 (1.21-3.06)†                      | 4.98 (2.89-8.59)‡                  | 2.71 (1.88-3.90)‡      |                   |                   |                 |
|              |                                        | Multivariate-adjusted HR (Model 3)     | 1.90 (1.19-3.03)†                      | 4.58 (2.63-7.95)‡                  | 2.64 (1.83-3.80)‡      |                   |                   |                 |
| <b>Women</b> |                                        |                                        |                                        |                                    |                        |                   |                   |                 |
| Code4        | No                                     | 5587                                   | cases                                  | 473 (Reference)                    | 130 (Reference)        | 596 (Reference)   |                   |                 |
|              |                                        |                                        | Minor                                  | 823                                | cases                  | 77                | 28                | 103             |
|              |                                        |                                        | Age- and gender- adjusted HR (Model 1) | 1.04 (0.81-1.32)                   | 1.41 (0.93-2.12)       | 1.11 (0.90-1.37)  |                   |                 |
|              |                                        |                                        |                                        | Multivariate-adjusted HR (Model 2) | 0.88 (0.69-1.13)       | 1.17 (0.77-1.77)  | 0.94 (0.76-1.17)  |                 |
|              |                                        |                                        |                                        | Multivariate-adjusted HR (Model 3) | 0.86 (0.67-1.10)       | 1.20 (0.78-1.82)  | 0.93 (0.75-1.15)  |                 |
|              | Major                                  | 229                                    | cases                                  | 46                                 | 5                      | 51                |                   |                 |
|              |                                        |                                        | Age- and gender- adjusted HR (Model 1) | 2.27 (1.67-3.07)‡                  | 0.90 (0.37-2.20)       | 1.99 (1.49-2.65)‡ |                   |                 |
|              |                                        |                                        | Multivariate-adjusted HR (Model 2)     | 1.62 (1.18-2.23)†                  | 0.59 (0.24-1.48)       | 1.41 (1.05-1.90)* |                   |                 |
|              |                                        |                                        | Multivariate-adjusted HR (Model 3)     | 1.46 (1.04-2.04)*                  | 0.58 (0.23-1.48)       | 1.29 (0.94-1.77)  |                   |                 |
| Code5        |                                        |                                        | 5705                                   | cases                              | 476 (Reference)        | 123 (Reference)   | 591 (Reference)   |                 |

|       |     |                                        |                   |                   |                   |
|-------|-----|----------------------------------------|-------------------|-------------------|-------------------|
| Minor | 703 | cases                                  | 76                | 31                | 106               |
|       |     | Age- and gender- adjusted HR (Model 1) | 1.10 (0.86-1.41)  | 1.84 (1.24-2.75)† | 1.27 (1.03-1.56)* |
|       |     | Multivariate-adjusted HR (Model 2)     | 0.94 (0.73-1.20)  | 1.64 (1.09-2.46)* | 1.09 (0.88-1.34)  |
|       |     | Multivariate-adjusted HR (Model 3)     | 0.89 (0.69-1.14)  | 1.72 (1.14-2.59)† | 1.05 (0.85-1.31)  |
| Major | 231 | cases                                  | 44                | 9                 | 53                |
|       |     | Age- and gender- adjusted HR (Model 1) | 2.31 (1.69-3.15)‡ | 1.83 (0.92-3.61)  | 2.24 (1.69-2.97)‡ |
|       |     | Multivariate-adjusted HR (Model 2)     | 1.90 (1.39-2.61)‡ | 1.42 (0.71-2.84)  | 1.84 (1.38-2.45)‡ |
|       |     | Multivariate-adjusted HR (Model 3)     | 1.82 (1.32-2.50)‡ | 1.44 (0.72-2.89)  | 1.78 (1.33-2.38)‡ |

\*P<0.05; †P<0.01; ‡P<0.001

Model 2: Covariates were age, gender, systolic blood pressure, antihypertensive medication, BMI, smoking category (never, past or current smokers), alcohol intake category (never, past, current <46, current ≥46 g/day), serum total cholesterol and diabetic type.

Model 3: Covariates comprised Model 2 plus other ECG abnormalities (high R-wave, ventricular premature beats, atrial fibrillation) at study entry.



|                     |   |       |     |             |        |               |               |                 |                |        |      |                |              |       |
|---------------------|---|-------|-----|-------------|--------|---------------|---------------|-----------------|----------------|--------|------|----------------|--------------|-------|
| Major               | → | Minor | 40  | 2.8 (110.3) | 85.0   | 56.2<br>(7.5) | 23.8<br>(3.9) | 139.8<br>(14.8) | 81.7<br>(10.8) | 28.2   | 20.5 | 6.9<br>(14.0)  | 200.4 (35.7) | 7.9   |
| Major               | → | Major | 191 | 2.5 (483.9) | 71.2   | 56.9<br>(8.6) | 24.6<br>(3.5) | 148.0<br>(25.3) | 84.9<br>(13.8) | 32.6   | 27.6 | 14.4<br>(23.7) | 199.1 (38.3) | 8.1   |
| P for<br>difference |   |       |     |             | <0.001 | <0.001        | <0.001        | <0.001          | <0.001         | <0.001 | 0.30 | 0.37           | <0.001       | 0.034 |

Values are the mean ± standard deviation or percentages, adjusted for age and gender.

Minnesota Code: Code4 minor; 4-3 to modified 4-5: Code4 major; 4-1 to 4-2: Code5 minor; 5-3 to modified 5-5: Code5 major; 5-1 to 5-2.
